# Supplementary material
Source: Copernicus journal article supplement (doi:10.5194/amt-19-3193-2026)
Supplement: Supplementary file 1 [file amt-19-3193-2026-supplement.pdf]

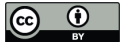

*Supplement of*

**Comparative analysis of GOME and SCIAMACHY  
reflectance over Pseudo-Invariant Calibration Sites:  
implications for spectrometers cross-calibration**

**Abdalmenem Owda and Günter Lichtenberg**

*Correspondence to:* Abdalmenem Owda ([abdalmenem.owda@dlr.de](mailto:abdalmenem.owda@dlr.de))

The copyright of individual parts of the supplement might differ from the article licence.

## Supplementary Figures

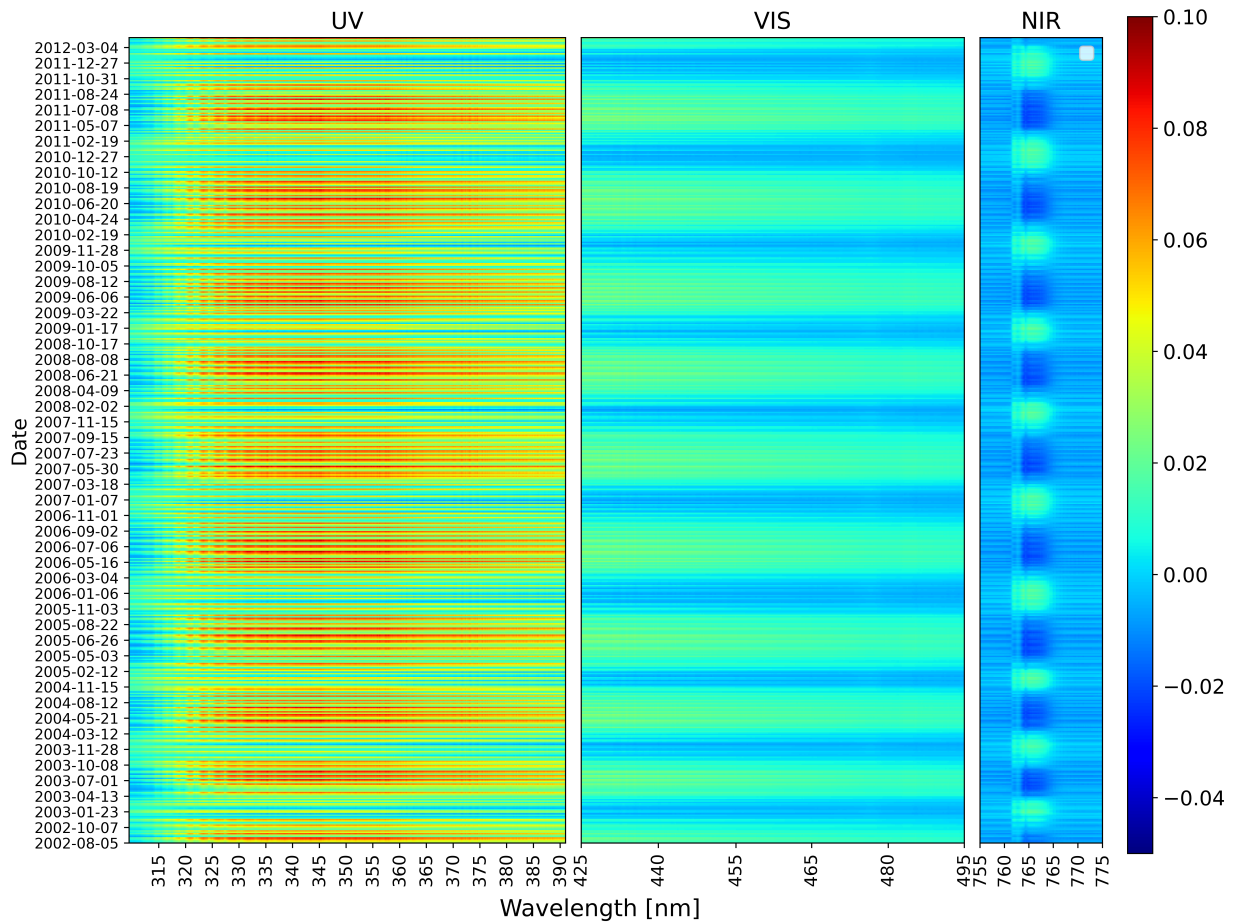

Figure S1: Heatmap of the difference in the reflectance observations of the Libya4 site. The difference was calculated based on the equation  $R_{corr} - R$  (corrected - original reflectance).

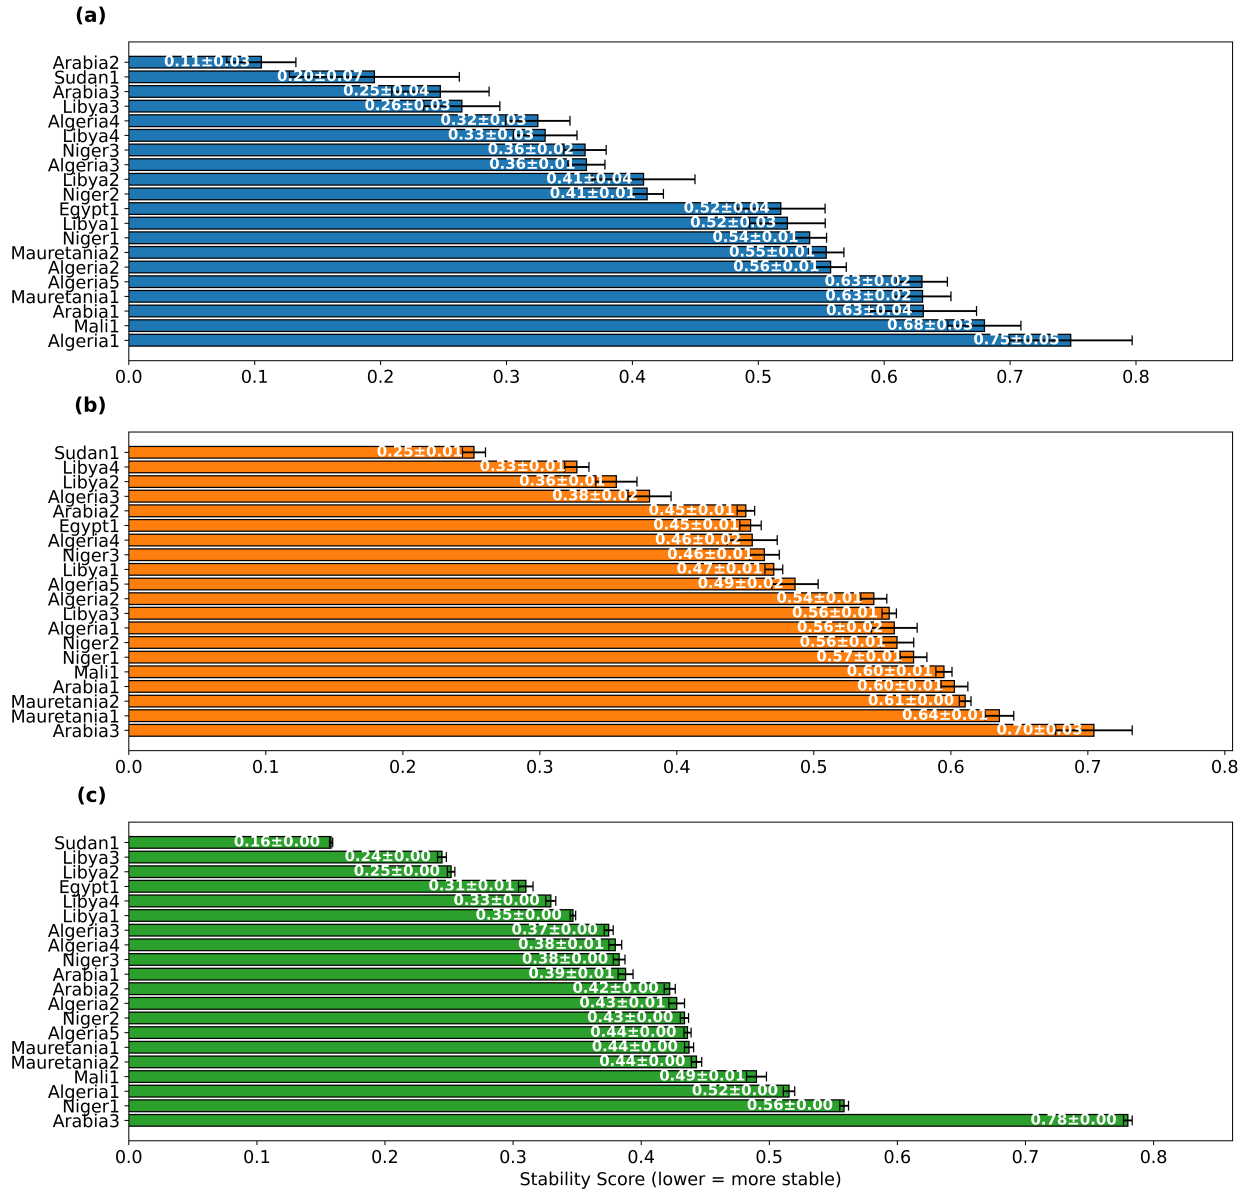

Figure S2: Ranking of pseudo-invariant calibration sites (PICS) based on the stability score (SS) of the spectral bands: (a) UV, (b) VIS, and (c) NIR.

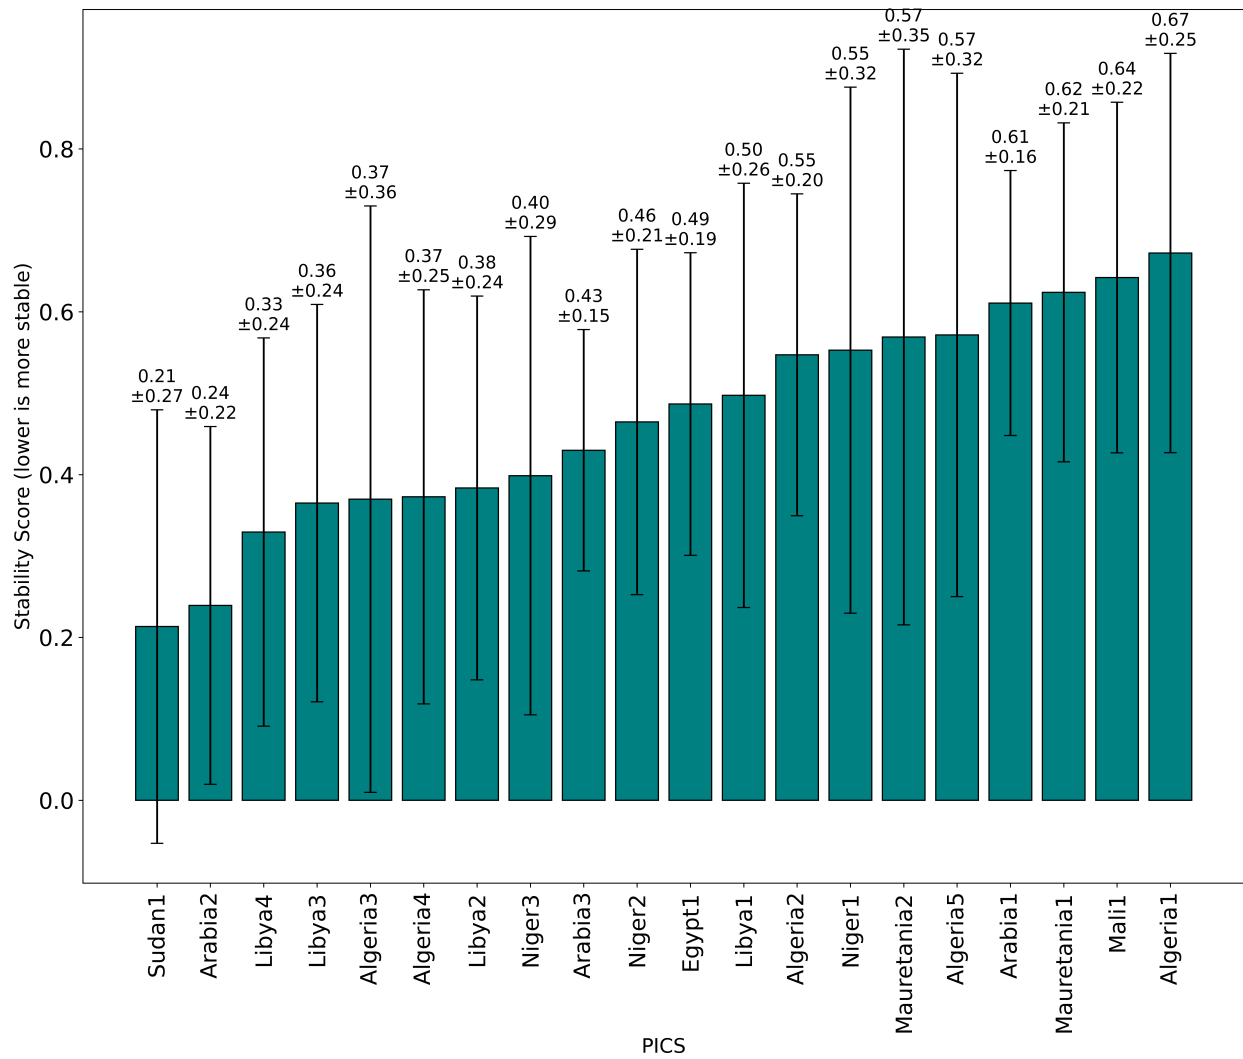

Figure S3: Average stability score ( $SS$ ) of each PICS derived from the spectral analysis. The mean  $SS$  and its standard deviation are shown for each site.

## Supplementary Tables

Table S1: Pseudo-invariant calibration sites (PICS) with their geographic coordinates and the number of collocated observations identified for the SCIAMACHY and GOME spectrometers.

| PICS        | Center longitude [°] | Center latitude [°] | SCIAMACHY | SCIAMACHY (CF < 0.25) | GOME | GOME (CF < 0.25) |
|-------------|----------------------|---------------------|-----------|-----------------------|------|------------------|
| Arabia1     | 46.76                | 18.88               | 571       | 548                   | 614  | 547              |
| Arabia2     | 50.96                | 20.13               | 594       | 562                   | 518  | 453              |
| Arabia3     | 43.73                | 28.92               | 658       | 563                   | 573  | 468              |
| Sudan1      | 28.22                | 21.74               | 583       | 565                   | 1095 | 979              |
| Niger1      | 9.81                 | 19.67               | 605       | 579                   | 1146 | 927              |
| Niger2      | 10.59                | 21.37               | 622       | 562                   | 860  | 708              |
| Niger3      | 7.96                 | 21.57               | 606       | 570                   | 1199 | 983              |
| Egypt1      | 26.10                | 27.12               | 587       | 553                   | 942  | 818              |
| Libya1      | 13.35                | 24.42               | 595       | 551                   | 881  | 737              |
| Libya2      | 20.48                | 25.05               | 609       | 579                   | 970  | 845              |
| Libya3      | 23.10                | 23.15               | 595       | 569                   | 785  | 704              |
| Libya4      | 23.39                | 28.55               | 666       | 568                   | 869  | 716              |
| Algeria1    | -0.40                | 23.80               | 609       | 554                   | 858  | 687              |
| Algeria2    | -1.38                | 26.09               | 567       | 528                   | 996  | 802              |
| Algeria3    | 7.66                 | 30.32               | 588       | 525                   | 1089 | 839              |
| Algeria4    | 5.59                 | 30.04               | 632       | 556                   | 1076 | 839              |
| Algeria5    | 2.23                 | 31.02               | 497       | 436                   | 1121 | 830              |
| Mali1       | -4.85                | 19.12               | 571       | 523                   | 1214 | 905              |
| Mauretania1 | 19.40                | 19.40               | 578       | 502                   | 858  | 656              |
| Mauretania2 | 20.85                | 20.85               | 601       | 543                   | 1214 | 947              |
